# Supplementary material for: Transcriptomic signature and metabolic programming of bovine classical and nonclassical monocytes indicate distinct functional specializations
Source: bioRxiv or medRxiv preprint supplement (doi:10.1101/2020.10.30.362731), 2020-11-01
Supplement: Supplementary file [file media-1.pdf]

# Supplementary Figure 1

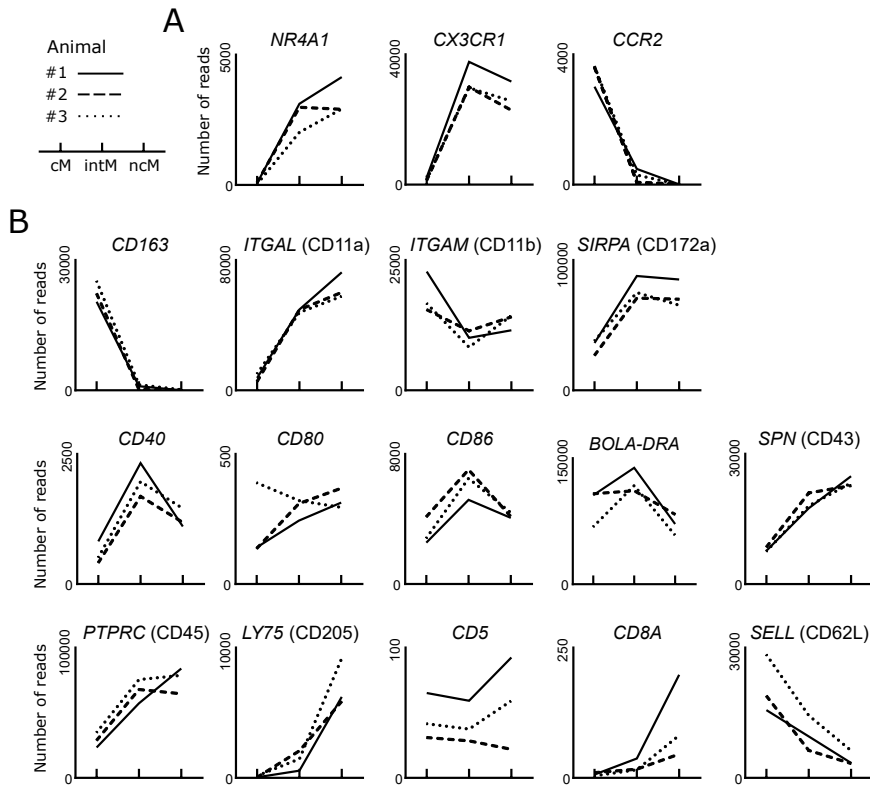

**Supplementary Figure 1** Transcription of key genes (A) and genes previously analyzed by flow cytometry (B). Illumina sequencing was performed on RNA isolated from sorted monocyte subsets (cM, intM, ncM) of three animals (#1-3). Graphs show the number of reads across monocyte subsets for selected genes with individual animals indicated by solid (#1), dashed (#2), and dotted (#3) lines.
